# Supplementary material for: Genetic flux over time in the Salmonella lineage
Source: PubMed Central journal article supplement (PMC2394748; doi:10.1186/gb-2007-8-6-r100), 2007-06-04

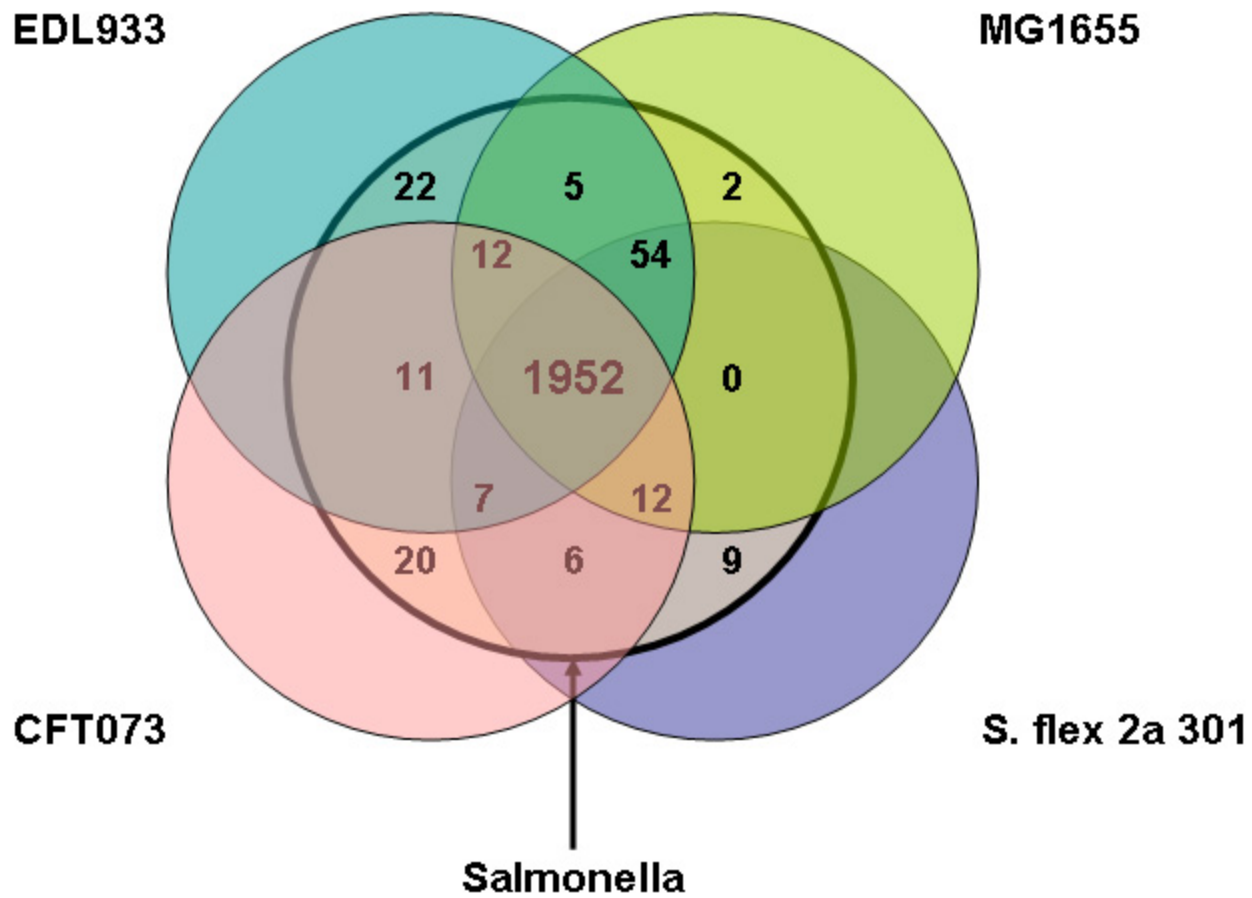

Supplement: gb-2007-8-6-r100-S4.pdf [file gb-2007-8-6-r100-S4.pdf]
