# Supplementary material for: Genetic flux over time in the Salmonella lineage
Source: PubMed Central journal article supplement (PMC2394748; doi:10.1186/gb-2007-8-6-r100), 2007-06-04

- Regulators
- Unknown
- Central/intermediary/misc metabolism
- Degradation of small molecules
- Degradation of large molecules
- Phage/IS elements
- Surface (IM, OM, secreted, surface structures[LPS etc])
- Information transfer (transcription/translation + DNA/RNA modification)
- Pseudogenes and partial genes (remnants)
- Energy metabolism (glycolysis, electron transport etc.)
- Conserved hypothetical
- Pathogenicity/Adaptation/Chaperones
- Stable RNA
- Non-phage

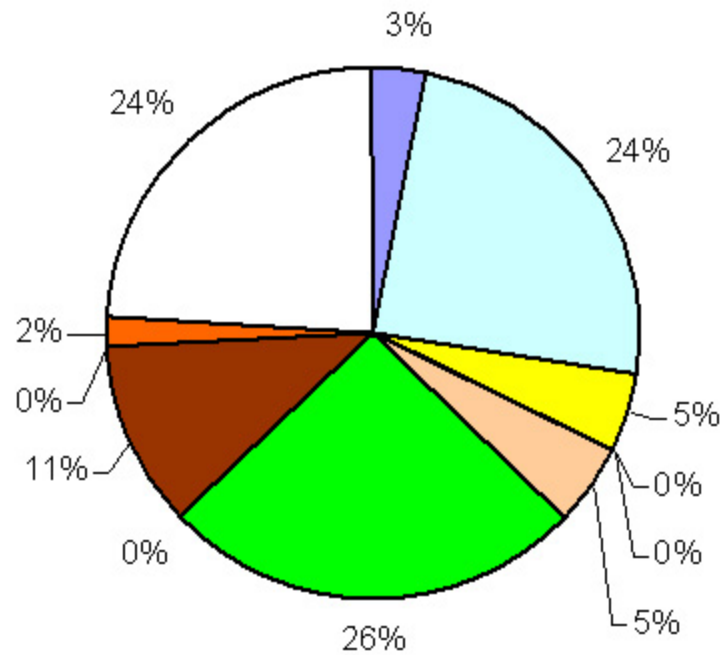

Supplement: gb-2007-8-6-r100-S5.pdf [file gb-2007-8-6-r100-S5.pdf]
