# Supplementary material for: Genetic flux over time in the Salmonella lineage
Source: PubMed Central journal article supplement (PMC2394748; doi:10.1186/gb-2007-8-6-r100), 2007-06-04

GC Content (%) Window size: 598

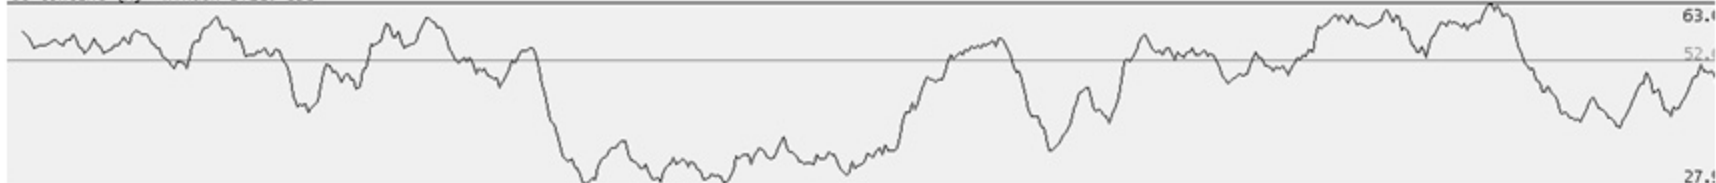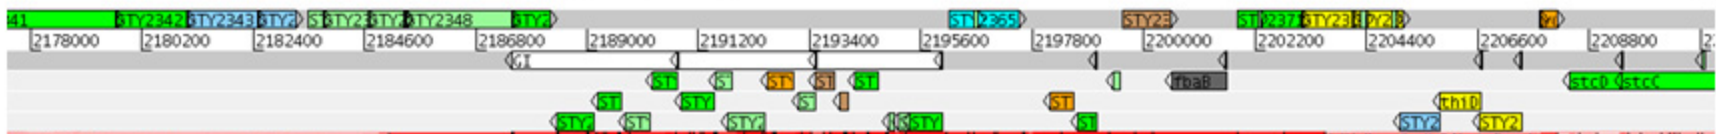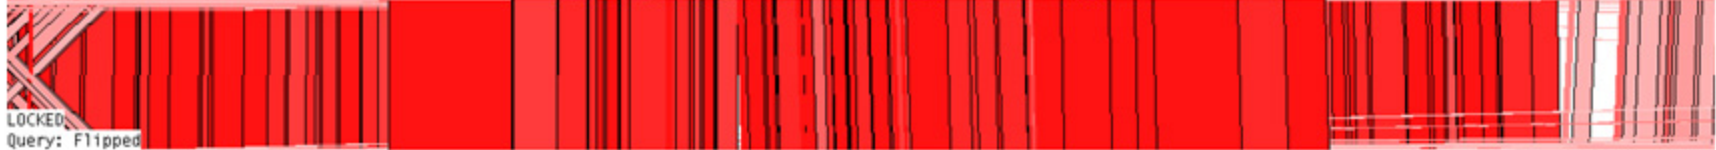

818400 816200 814000 811800 809600 807400 805200 803000 800800 798600 796400 794200 792000 789800 787600

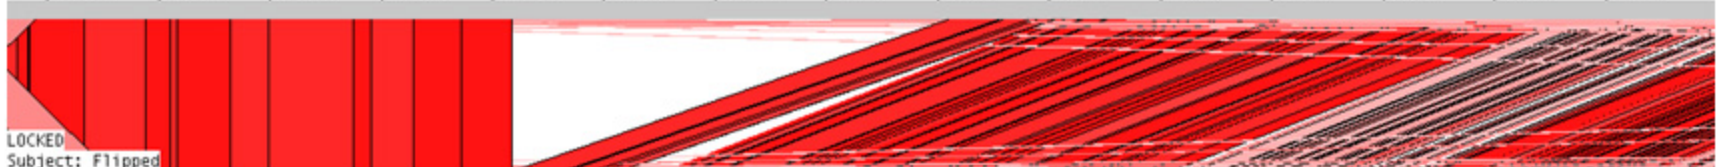

2219800 2222000 2224200 2226400 2228600 2230800 2233000 2235200 2237400 2239600 2241800 2244000 2246200 2248400 2250600 2252800 2255000 2257200

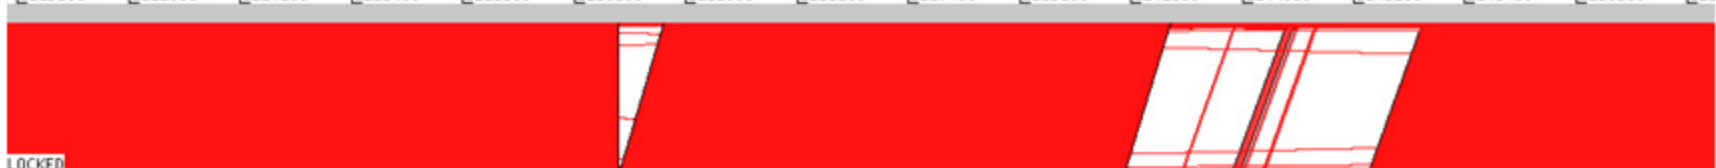

2224200 2226400 2228600 2230800 2233000 2235200 2237400 2239600 2241800 2244000 2246200 2248400 2250600 2252800 2255000 2257200

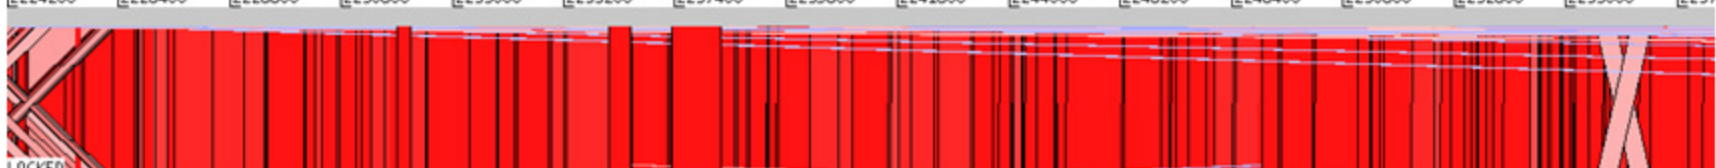

2215400 2217600 2219800 2222000 2224200 2226400 2228600 2230800 2233000 2235200 2237400 2239600 2241800 2244000 2246200 2248400 2250600 2252800 2255000 2257200

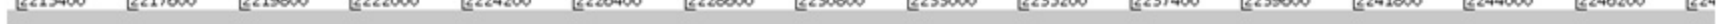

Supplement: gb-2007-8-6-r100-S6.pdf [file gb-2007-8-6-r100-S6.pdf]
